# Supplementary material for: Concurrent and lagged effects of psychosocial job stressors on symptoms of burnout
Source: PubMed Central journal article supplement (PMC6768907; doi:10.1007/s00420-019-01437-0), 2019-05-20
Supplement: 420_2019_1437_MOESM2_ESM.pdf [file 420_2019_1437_MOESM2_ESM.pdf]

## APPENDIX 2

*Table 2 Longitudinal analysis showing concurrent effects between burnout symptoms measured using SMBQ<sup>1</sup> and each of the workplace factors; regression coefficients (Coeff), 95% confidence interval (CI). All p-values (type III) were <0.0001 in both models.*

|                             | Model 1* |             |         | Model 2** |              |         |
|-----------------------------|----------|-------------|---------|-----------|--------------|---------|
|                             | Coeff.   | 95% CI      | p-value | Coeff.    | 95% CI       | p-value |
| <i>Intercept</i>            | 67.31    | 66.67;67.95 | <0.0001 | 20.56     | 18.48;22.64  | <0.0001 |
| <i>Demand<sup>2</sup></i>   |          |             | <0.0001 |           |              | <0.0001 |
| High                        | 6.02     | 5.24;6.80   |         | 3.51      | 2.63;4.39    |         |
| Medium                      | 2.93     | 2.34;3.52   |         | 1.76      | 1.08;2.44    |         |
| Low                         | 0        |             |         | 0         |              |         |
| Time                        | -0.36    | -0.46;-0.25 | <0.0001 |           |              |         |
| <i>Social support</i>       |          |             |         |           |              | <0.0001 |
| No                          |          |             |         | 2.66      | 1.57;3.76    |         |
| Yes                         |          |             |         | 0         |              |         |
| <i>Physical activity</i>    |          |             |         |           |              | <0.0001 |
| Sedentary                   |          |             |         | 4.44      | 3.59;5.30    |         |
| Light                       |          |             |         | 1.43      | 0.86;2.00    |         |
| Moderate/intense            |          |             |         | 0         |              |         |
| <i>SMBQlag</i>              |          |             |         | 0.67      | 0.65;0.69    | <0.0001 |
| <i>Age</i>                  |          |             |         | -0.31     | -0.06;-0.004 | 0.025   |
| <i>Intercept</i>            | 68.38    | 67.85;68.91 | <0.0001 | 20.72     | 18.65;22.78  | <0.0001 |
| <i>Decision<sup>2</sup></i> |          |             | <0.0001 |           |              | <0.0001 |
| Low                         | 3.58     | 2.98;4.17   |         | 1.99      | 1.38;2.60    |         |
| Medium                      | 2.11     | 1.56;2.67   |         | 1.15      | 0.48;1.82    |         |
| High                        | 0        | 0           |         | 0         |              |         |
| Time                        | -0.42    | -0.53;-0.32 | <0.0001 |           |              |         |
| <i>Social support</i>       |          |             |         |           |              | <0.0001 |
| No                          |          |             |         | 2.71      | 1.61;3.80    |         |
| Yes                         |          |             |         | 0         |              |         |
| <i>Physical activity</i>    |          |             |         |           |              | <0.0001 |
| Sedentary                   |          |             |         | 4.36      | 3.51;5.22    |         |
| Light                       |          |             |         | 1.30      | 0.73;1.87    |         |
| Moderate/intense            |          |             |         | 0         |              |         |
| <i>SMBQlag</i>              |          |             |         | 0.67      | 0.65;0.69    | <0.0001 |
| <i>Age</i>                  |          |             |         | -0.03     | -0.05;0.001  | 0.060   |
| <i>Intercept</i>            | 67.56    | 66.97;68.16 | <0.0001 | 21.36     | 19.27;23.44  | <0.0001 |
| <i>Effort<sup>3</sup></i>   |          |             | <0.0001 |           |              | <0.0001 |
| High                        | 5.67     | 5.00;6.35   |         | 3.61      | 2.85;4.36    |         |

|                           |       |             |         |       |              |         |
|---------------------------|-------|-------------|---------|-------|--------------|---------|
| Medium                    | 2.30  | 1.76;2.85   |         | 1.33  | 0.69;1.97    |         |
| Low                       | 0     |             |         | 0     |              |         |
| Time                      | -0.30 | -0.41;-0.20 | <0.0001 |       |              |         |
| <i>Social support</i>     |       |             |         |       |              | <0.0001 |
| No                        |       |             |         | 2.79  | 1.69;3.89    |         |
| Yes                       |       |             |         | 0     |              |         |
| <i>Physical activity</i>  |       |             |         |       |              | <0.0001 |
| Sedentary                 |       |             |         | 4.48  | 3.62;5.34    |         |
| Light                     |       |             |         | 1.39  | 0.82;1.97    |         |
| Moderate/intense          |       |             |         | 0     |              |         |
| <i>SMBQlag</i>            |       |             |         | 0.66  | 0.64;0.68    | <0.0001 |
| <i>Age</i>                |       |             |         | -0.04 | -0.06;-0.008 | 0.011   |
| <i>Intercept</i>          | 69.42 | 69.00;69.84 | <0.0001 | 22.31 | 20.16;24.45  | <0.0001 |
| <i>Reward<sup>3</sup></i> |       |             | <0.0001 |       |              | <0.0001 |
| Low                       | 6.11  | 5.02;7.20   |         | 4.70  | 3.28;6.13    |         |
| Medium                    | 3.18  | 2.51;3.86   |         | 2.71  | 1.83;3.60    |         |
| High                      | 0     | 0           |         | 0     |              |         |
| Time                      | -0.38 | -0.49;-0.26 | <0.0001 |       |              |         |
| <i>Social support</i>     |       |             |         |       |              | <0.0001 |
| No                        |       |             |         | 2.54  | 1.38;3.70    |         |
| Yes                       |       |             |         | 0     |              |         |
| <i>Physical activity</i>  |       |             |         |       |              | <0.0001 |
| Sedentary                 |       |             |         | 4.54  | 3.64;5.45    |         |
| Light                     |       |             |         | 1.30  | 0.71;1.90    |         |
| Moderate/intense          |       |             |         | 0     |              |         |
| <i>SMBQlag</i>            |       |             |         | 0.66  | 0.63;0.68    | <0.0001 |
| <i>Age</i>                |       |             |         | -0.03 | -0.06;0.002  | 0.070   |
| <i>Intercept</i>          | 69.42 | 68.99;69.84 | <0.0001 | 21.30 | 19.25;23.35  | <0.0001 |
| <i>JDC<sup>4</sup></i>    |       |             | <0.0001 |       |              | <0.0001 |
| Joint exposure            | 5.37  | 4.55;6.19   |         | 3.67  | 2.69;4.65    |         |
| Demand only               | 3.12  | 2.36;3.88   |         | 1.56  | 0.58;2.53    |         |
| Decision only             | 2.03  | 1.49;2.56   |         | 1.20  | 0.62;1.78    |         |
| No exposure               | 0     |             |         | 0     |              |         |
| Time                      | -0.38 | -0.49;-0.26 | <0.0001 |       |              |         |
| <i>Social support</i>     |       |             |         |       |              | <0.0001 |
| No                        |       |             |         | 2.64  | 1.54;3.74    |         |
| Yes                       |       |             |         | 0     |              |         |
| <i>Physical activity</i>  |       |             |         |       |              | <0.0001 |
| Sedentary                 |       |             |         | 4.39  | 3.54;5.25    |         |
| Light                     |       |             |         | 1.39  | 0.81;1.96    |         |
| Moderate/intense          |       |             |         | 0     |              |         |

|                          |       |             |         |       |              |         |
|--------------------------|-------|-------------|---------|-------|--------------|---------|
| <i>SMBQlag</i>           |       |             |         | 0.67  | 0.65;0.69    | <0.0001 |
| Age                      |       |             |         | -0.03 | -0.06;-0.001 | 0.044   |
| <i>Intercept</i>         | 68.83 | 68.39;69.27 | <0.0001 | 21.07 | 19.42;22.71  | <0.0001 |
| <i>ERI</i> <sup>5</sup>  |       |             | <0.0001 |       |              | <0.0001 |
| Joint exposure           | 7.87  | 6.32;9.41   |         | 5.83  | 3.79;7.85    |         |
| Effort only              | 3.93  | 3.37;4.50   |         | 2.84  | 2.16;3.52    |         |
| Reward Only              | 5.62  | 4.16;7.07   |         | 4.43  | 2.45;6.40    |         |
| No exposure              | 0     |             |         | 0     |              |         |
| Time                     | -0.32 | -0.44;-0.21 | <0.0001 |       |              |         |
| <i>Social support</i>    |       |             |         |       |              | <0.0001 |
| No                       |       |             |         | 2.77  | 1.61;3.94    |         |
| Yes                      |       |             |         | 0     |              |         |
| <i>Physical activity</i> |       |             |         |       |              | <0.0001 |
| Sedentary                |       |             |         | 4.43  | 3.53;5.34    |         |
| Light                    |       |             |         | 1.20  | 0.60;1.80    |         |
| Moderate/intense         |       |             |         | 0     |              |         |
| <i>SMBQlag</i>           |       |             |         | 0.65  | 0.63;0.68    | <0.0001 |
| Age                      |       |             |         | -0.03 | -0.06;-0.003 | 0.032   |

<sup>1</sup>Shirom-Melamed Burnout Questionnaire, <sup>2</sup>Demand-Control Questionnaire, Decision Authority=subscale of the Control dimension, <sup>3</sup>Effort-Reward Questionnaire, <sup>4</sup> Job Demand-Control, <sup>5</sup>Effort-Reward Imbalance. \*adjusted for time \*\*Adjusted for social support, physical activity, age and SMBQlag.

*Table 4 Longitudinal analysis showing lagged effects between burnout symptoms measured using SMBQ<sup>1</sup> and each of the workplace factors; regression coefficients (Coeff), 95% confidence interval (CI).*

|                             | <i>Model 1*</i> |               |                | <i>Model 2**</i> |               |                |
|-----------------------------|-----------------|---------------|----------------|------------------|---------------|----------------|
|                             | <i>Coeff.</i>   | <i>95% CI</i> | <i>p-value</i> | <i>Coeff.</i>    | <i>95% CI</i> | <i>p-value</i> |
| <i>Intercept</i>            | 68.12           | 67.30;68.95   | <0.0001        | 21.69            | 19.86;23.51   | <0.0001        |
| <i>Demand<sup>2</sup></i>   |                 |               | <0.0001        |                  |               | 0.901          |
| High                        | 2.84            | 1.94;3.74     |                | 0.18             | -0.60;0.96    |                |
| Medium                      | 1.07            | 0.40;1.75     |                | 0.11             | -0.51;0.73    |                |
| Low                         | 0               |               |                | 0                |               |                |
| <i>Time</i>                 | -0.13           | -0.25;-0.01   | 0.033          |                  |               |                |
| <i>Social support</i>       |                 |               |                |                  |               | <0.0001        |
| No                          |                 |               |                | 2.86             | 1.88;3.84     |                |
| Yes                         |                 |               |                | 0                |               |                |
| <i>Physical activity</i>    |                 |               |                |                  |               | <0.0001        |
| Sedentary                   |                 |               |                | 4.05             | 3.31;4.80     |                |
| Light                       |                 |               |                | 1.30             | 0.80;1.81     |                |
| Moderate/intense            |                 |               |                | 0                |               |                |
| <i>SMBQlag</i>              |                 |               |                | 0.68             | 0.66;0.70     | <0.0001        |
| <i>Age</i>                  |                 |               |                | -0.04            | -0.06;-0.01   | 0.002          |
| <i>Intercept</i>            | 68.97           | 68.27;69.67   | <0.0001        | 21.68            | 19.88;23.49   | <0.0001        |
| <i>Decision<sup>2</sup></i> |                 |               | 0.059          |                  |               | 0.679          |
| Low                         | 0.82            | 0.14;1.51     |                | 0.21             | -0.34;0.75    |                |
| Medium                      | 0.55            | -0.10;1.10    |                | 0.01             | -0.60;0.58    |                |
| High                        | 0               |               |                |                  |               |                |
| <i>Time</i>                 | -0.17           | -0.29;-0.05   | 0.005          |                  |               |                |
| <i>Social support</i>       |                 |               |                |                  |               | <0.0001        |
| No                          |                 |               |                | 2.78             | 1.80;3.76     |                |
| Yes                         |                 |               |                | 0                |               |                |
| <i>Physical activity</i>    |                 |               |                |                  |               | <0.0001        |
| Sedentary                   |                 |               |                | 4.02             | 3.27;4.76     |                |
| Light                       |                 |               |                | 1.30             | 0.79;1.80     |                |
| Moderate/intense            |                 |               |                | 0                |               |                |
| <i>SMBQlag</i>              |                 |               |                | 0.68             | 0.66;0.70     | <0.0001        |
| <i>Age</i>                  |                 |               |                | -0.04            | -0.06;-0.01   | 0.002          |
| <i>Intercept</i>            | 68.52           | 67.72;69.32   | <0.0001        | 21.91            | 20.07;23.75   | <0.0001        |
| <i>Effort<sup>3</sup></i>   |                 |               | <0.0001        |                  |               | 0.621          |
| High                        | 1.82            | 1.03;2.61     |                | 0.32             | -0.37;1.00    |                |
| Medium                      | 0.70            | 0.05;1.34     |                | 0.07             | -0.52;0.66    |                |
| Low                         | 0               |               |                |                  |               |                |
| <i>Time</i>                 | -0.14           | -0.27;-0.02   | 0.021          |                  |               |                |

|                           |       |             |         |       |             |         |
|---------------------------|-------|-------------|---------|-------|-------------|---------|
| <i>Social support</i>     |       |             |         |       |             | <0.0001 |
| No                        |       |             |         | 2.91  | 1.92;3.90   |         |
| Yes                       |       |             |         | 0     |             |         |
| <i>Physical activity</i>  |       |             |         |       |             | <0.0001 |
| Sedentary                 |       |             |         | 3.97  | 3.22;4.73   |         |
| Light                     |       |             |         | 1.26  | 0.75;1.77   |         |
| Moderate/intense          |       |             |         | 0     |             |         |
| <i>SMBQlag</i>            |       |             |         | 0.68  | 0.66;0.70   | <0.0001 |
| <i>Age</i>                |       |             |         | -0.04 | -0.07;-0.02 | 0.001   |
| <i>Intercept</i>          | 68.79 | 68.18;69.41 | <0.0001 | 22.79 | 20.92;24.67 | <0.0001 |
| <i>Reward<sup>3</sup></i> |       |             | <0.0001 |       |             | <0.0001 |
| Low                       | 3.54  | 2.28;4.80   |         | 1.18  | 0.02;2.34   |         |
| Medium                    | 2.46  | 1.69;3.22   |         | 1.46  | 0.72;2.20   |         |
| High                      | 0     | 0           |         |       |             |         |
| <i>Time</i>               | -0.14 | -0.27;-0.01 | 0.036   |       |             |         |
| <i>Social support</i>     |       |             |         |       |             | <0.0001 |
| No                        |       |             |         | 2.74  | 1.71;3.77   |         |
| Yes                       |       |             |         | 0     |             |         |
| <i>Physical activity</i>  |       |             |         |       |             | <0.0001 |
| Sedentary                 |       |             |         | 4.20  | 3.42;5.00   |         |
| Light                     |       |             |         | 1.41  | 0.89;1.94   |         |
| Moderate/intense          |       |             |         | 0     |             |         |
| <i>SMBQlag</i>            |       |             |         | 0.66  | 0.64;0.69   | <0.0001 |
| <i>Age</i>                |       |             |         | -0.04 | -0.06;-0.01 |         |
| <i>Intercept</i>          | 68.85 | 68.20;69.49 | <0.0001 | 21.81 | 20.00;23.61 | <0.0001 |
| <i>JDC<sup>4</sup></i>    |       |             | <0.0001 |       |             | 0.198   |
| <i>Joint exposure</i>     | 2.51  | 1.56;3.47   |         | 0.69  | -0.16;1.54  |         |
| <i>Demand only</i>        | 1.57  | 0.70;2.44   |         | -0.49 | -1.31;0.33  |         |
| <i>Decision only</i>      | 0.41  | -0.20;1.03  |         | 0.01  | -0.51;0.53  |         |
| <i>No exposure</i>        | 0     |             |         |       |             |         |
| <i>Time</i>               | -0.14 | -0.27;-0.02 | 0.022   |       |             |         |
| <i>Social support</i>     |       |             |         |       |             | <0.0001 |
| No                        |       |             |         | 2.80  | 1.82;3.79   |         |
| Yes                       |       |             |         | 0     |             |         |
| <i>Physical activity</i>  |       |             |         |       |             | <0.0001 |
| Sedentary                 |       |             |         | 4.02  | 3.27;4.77   |         |
| Light                     |       |             |         | 1.29  | 0.79;1.80   |         |
| Moderate/intense          |       |             |         | 0     |             |         |
| <i>SMBQlag</i>            |       |             |         | 0.68  | 0.66;0.70   | <0.0001 |
| <i>Age</i>                |       |             |         | -0.03 | -0.06;-0.01 | 0.003   |
| <i>Intercept</i>          | 68.80 | 68.15;69.44 | <0.0001 | 22.71 | 20.80;24.61 | <0.0001 |

|                          |       |            |         |       |             |         |
|--------------------------|-------|------------|---------|-------|-------------|---------|
| <i>ERI</i> <sup>5</sup>  |       |            | <0.0001 |       |             | 0.231   |
| <i>Joint exposure</i>    | 3.88  | 2.08;5.69  |         | 1.36  | -0.33;3.06  |         |
| <i>Effort only</i>       | 1.22  | 0.58;1.88  |         | 0.39  | -0.20;0.98  |         |
| <i>Reward Only</i>       | 2.86  | 1.17;4.54  |         | 0.74  | -0.83;2.32  |         |
| <i>No exposure</i>       | 0     |            |         | 0     |             |         |
| <i>Time</i>              | -0.13 | -0.26;0.01 | 0.054   |       |             |         |
| <i>Social support</i>    |       |            |         |       |             | <0.0001 |
| No                       |       |            |         | 2.84  | 1.79;3.88   |         |
| Yes                      |       |            |         | 0     |             |         |
| <i>Physical activity</i> |       |            |         |       |             | <0.0001 |
| Sedentary                |       |            |         | 4.10  | 3.30;4.89   |         |
| Light                    |       |            |         | 1.34  | 0.81;1.87   |         |
| Moderate/intense         |       |            |         | 0     |             |         |
| <i>SMBQlag</i>           |       |            |         | 0.67  | 0.65;0.69   | <0.0001 |
| <i>Age</i>               |       |            |         | -0.04 | -0.07;-0.01 | 0.003   |

<sup>1</sup>Shirom-Melamed Burnout Questionnaire, <sup>2</sup>Demand-Control Questionnaire, Decision Authority=subscale of the Control dimension, <sup>3</sup>Effort-Reward Questionnaire, <sup>4</sup> Job Demand-Control, <sup>5</sup>Effort-Reward Imbalance. \*adjusted for time \*\*Adjusted for social support, physical activity, age and SMBQlag.
